1 **Title**

2 STAG: Species Tree Inference from All Genes

3 **Authors**

4 Emms, D.M.<sup>1</sup> and Kelly, S.<sup>1\*</sup>

5 **Affiliations**

6 1) Department of Plant Sciences, University of Oxford, South Parks Road, Oxford, OX1 3RB, UK.

7 **Corresponding Author**

8 Email: [steven.kelly@plants.ox.ac.uk](mailto:steven.kelly@plants.ox.ac.uk), Phone: +44-1865-275123

9 **Running title**

10 Species Tree Inference from All Genes

11 **Keywords**

12 Species tree inference, phylogeny

13 **Abstract**

14 Species tree inference is fundamental to our understanding of the evolution of life on earth. However,  
15 species tree inference from molecular sequence data is complicated by gene duplication events that  
16 limit the availability of suitable data for phylogenetic reconstruction. Here we propose a novel method  
17 for species tree inference called STAG that is specifically designed to leverage data from multi-copy  
18 gene families. By application to 12 real species datasets sampled from across the eukaryotic domain  
19 we demonstrate that species trees inferred from multi-copy gene families are comparable in  
20 accuracy to species trees inferred from single-copy orthologues. We further show that the ability to  
21 utilise data from multi-copy gene families increases the amount of data available for species tree  
22 inference by an average of 8 fold. We reveal that on real species datasets STAG has higher accuracy  
23 than other leading methods for species tree inference; including concatenated alignments of protein  
24 sequences, ASTRAL & NJst. Finally we show that STAG is fast, memory efficient and scalable and  
25 thus suitable for analysis of large multispecies datasets.

## 26 ***Introduction***

27 The correct species tree is fundamental to understanding the diversity and history of life on earth.  
28 To infer species trees, researchers typically combine sequence data from sets of orthologous  
29 sequences (Jarvis, et al. 2014; Mao, et al. 2015; Ruhfel, et al. 2014). Often this is sets of protein  
30 coding genes, but can also include conserved non-transcribed elements as well as RNA genes and  
31 other nucleotide sequences. A common approach to integrating the information contained within  
32 multiple different genes is to join them together to form a concatenated multiple sequence alignment  
33 (CMSA). This is often preceded by checks to search for conflicts between the individual trees  
34 (James, et al. 2006; Perelman, et al. 2011; Ruhfel, et al. 2014) as well as tests to determine whether  
35 the data should be partitioned between genes (James, et al. 2006), data type (Jarvis, et al. 2014;  
36 Perelman, et al. 2011) or according to Akaike or Bayesian information criteria (Mao, et al. 2015;  
37 Meredith, et al. 2011). However, doubts have been raised about CMSA, with problems ranging from  
38 high bootstrap support for contentious branches (Salichos and Rokas 2013), to its statistical  
39 inconsistency under the multi-species coalescent model of incomplete lineage sorting (Roch and  
40 Steel 2015). Methods such as NJst (Liu and Yu 2011) and ASTRAL (Mirarab, et al. 2014) have been  
41 developed that bypass the concatenation problem and infer a species tree from a set of gene trees.  
42 However, both concatenation methods such as NJst and ASTRAL require data from groups of single-  
43 copy orthologues genes, and the number of such genes in a group of species can be limited due to  
44 differing patterns of gene duplication and loss in the species sets being considered.

45 Species tree inference methods such as PHYLOG (Boussau, et al. 2013) and Guenomu (Martins,  
46 et al. 2016) are not restricted to one-to-one orthologues and can therefore use more of the available  
47 whole-genome data. For example, PHYLOG (Boussau, et al. 2013) jointly infers the species tree  
48 and the gene trees under a maximum likelihood model that combines a model for sequence evolution  
49 with a model for gene duplication and loss. However, the method is not suited to large datasets: to  
50 analyse 36 species and at most 100 genes per gene family, the method used 3000 processors of  
51 one of the top 500 supercomputers at the time (Boussau, et al. 2013). Thus, species tree inference  
52 methods that use single-copy genes are restricted in the amount of data they can access, and

53 methods that can use multi-copy genes require computational resources that are beyond the reach  
54 of most research groups.

55 Here we present STAG (Species Tree inference from All Genes), a novel algorithm for inferring a  
56 species tree from sets of multi-copy gene trees. Through application to 12 real world datasets  
57 sampled throughout the eukaryotic domain we show that STAG is the most accurate method for  
58 species tree inference. Moreover, we demonstrate that consensus species trees generated using  
59 STAG have properties such as realistic support values and branch lengths that are suitable for  
60 downstream comparative analysis.

## 61 **Results**

### 62 ***Problem definition and benchmark datasets***

63 Species tree inference methods are commonly tested on simulated sequence data (Liu and Yu 2011;  
64 Martins, et al. 2016; Mirarab, et al. 2014). However, the statistical similarity of these datasets to real  
65 biological datasets is not examined and the performance of the tested methods is not compared to  
66 expert curation of known species trees. To rectify this and provide comparative evaluation of species  
67 tree inference methods on real biological data, a collection of 12 diverse clades of species were  
68 sampled from throughout the eukaryotic domain (Table 1) (Emms and Kelly 2017). These datasets  
69 have varying numbers of species and rates of gene duplication (Emms and Kelly 2017), and have a  
70 broad range of estimated divergence times from c. 56 My for the Primates (dos Reis, et al. 2014) to  
71 c. 1,500 My for the Green Plants (Parfrey, et al. 2011). For each clade of species a published study  
72 was identified that provides a reference topology for the species tree derived from expert curation of  
73 molecular data (Table 2, Supplemental File S1). In all cases this reference topology is taken as true  
74 and is used as a benchmark for species tree inference method evaluation.

### 75 ***Sets of one-to-one orthologues are rare, and decrease as a function of cumulative 76 evolutionary distance between sampled species***

77 To provide a common input dataset on which to test multiple species tree inference methods  
78 orthogroups were inferred for each of these 12 datasets using OrthoFinder (Emms and Kelly 2015).  
79 Several of the methods under consideration here require datasets of one-to-one orthologues that  
80 are present in all (or most) of the species being investigated. Thus the number of genes per species  
81 in each orthogroup was analysed. For each species set, there are large numbers of orthogroups in

82 which every species is present. However, few of these orthogroups contain just one orthologue from  
83 each species (single-copy orthogroups, Figure 1). On average there are 8.4 times more orthogroups  
84 with all species present than single-copy orthogroups with all species present (Table 1). In the plant  
85 species dataset large numbers of gene and genome duplication events (Lee, et al. 2013) mean that  
86 there are no single-copy orthogroups present in all species (Table 1). In contrast, at the other end of  
87 the spectrum the bird species have small genomes (Jarvis, et al. 2014) and low rates of gene  
88 duplication (Emms and Kelly 2017) resulting in large numbers of single-copy orthogroups (Table 1).  
89 Thus in real world datasets, while orthogroups that contain all species are common, orthogroups that  
90 contain just one orthologue from each species comparatively rare.

91 Across the 12 biological datasets the number of single-copy orthogroups was negatively correlated  
92 with the number of species under consideration, but not significantly so (Figure 2A,  $r^2=0.22$ ,  $p =$   
93  $0.12$ ). Taking divergence time into consideration too, the number of single-copy orthogroups was  
94 significantly negatively correlated with the species tree length (Figure 2B,  $r^2=0.62$ ,  $p = 0.002$ ). Thus,  
95 the number of single copy orthogroups available for analysis decreases due to the combined effect  
96 of increasing number of species and the divergence time of those species.

97 ***Species trees from multi-copy gene families are of comparable accuracy to those***  
98 ***from single-copy gene families***

99 Given the limited availability of single copy orthogroups in real biological datasets described above,  
100 the ability to use multi-copy orthogroups would help mitigate the problem of low data availability.  
101 However, existing methods that can use multi-copy genes require computational resources that are  
102 beyond the reach of most research groups (Boussau, et al. 2013). To address this problem, a novel  
103 method called STAG (Species Tree from All Genes) was developed. Full details of the algorithm are  
104 provided in the Methods. In brief, STAG analyses each multi-copy gene tree in turn. For a given tree,  
105 the distances between each pair of sequences on the gene tree are analysed. For a given species  
106 pair, the gene-pair with the shortest distance on the tree is selected as these genes will most likely  
107 be orthologues. In the unlikely event where these gene pairs are not orthologues, then the selected  
108 gene pair is more closely related than any pair of orthologues for the same species-pair in the same  
109 gene tree. A species tree is then inferred from this gene tree by evaluating the set of minimum  
110 pairwise distance estimates between all species using the minimum evolution principle (Lefort, et al.

111 2015). In this way each multi-copy gene tree is able to provide an estimate of the underlying species  
112 tree.

113 To test the accuracy of these species trees inferred from multi-copy genes, the complete set of  
114 species trees inferred from multi-copy gene trees from the 12 species sets were subject to  
115 topological analysis. Here, each multi-copy gene orthogroup was subject to multiple sequence  
116 alignment using MAFFT L-INS-i (Kato and Standley 2013) and phylogenetic inference using IQ-  
117 TREE (Nguyen, et al. 2015). Species trees were inferred from each multi-copy orthogroup gene tree  
118 using STAG, and the Robinson-Foulds distance (Robinson and Foulds 1981) between the STAG  
119 tree and the published species tree was evaluated. To place these results in context, the complete  
120 set of gene trees inferred by IQ-TREE from single copy orthogroups for the same species dataset  
121 was also subject to the same Robinson-Foulds distance analysis. Single copy gene trees produced  
122 in this manner are conventionally used for species tree inference as they each contain an estimate  
123 of the underlying species tree. Comparison of the two approaches revealed that species trees  
124 inferred from multi-copy gene orthogroups using STAG were of comparable accuracy to species  
125 trees inferred from single copy gene orthogroups using conventional methods (Figure 3,  
126 Supplemental File S1 Table S1).

127 Across the 12 biological datasets, inclusion of STAG trees extracted from multi copy gene  
128 orthogroups increased the mean RF distance of the set of trees available for species tree inference  
129 by ~3% (Table 2). However, the average amount of data available for species tree inference  
130 increased on average by 800% (Table 2). Thus, for a small increase in the amount of error per tree,  
131 there is a substantial increase in the data available for tree inference.

132 ***Consensus species trees inferred using STAG are more accurate than other methods***  
133 ***on real biological datasets***

134 Given STAG provides a substantial increase in data availability with only a small penalty to mean  
135 dataset accuracy it was determined how this would affect the overall accuracy of species tree  
136 inference when these trees are integrated. To investigate this, a consensus species tree for each of  
137 the 12 species datasets was inferred by taking the greedy consensus (Felsenstein 2005; Swofford  
138 and Sullivan 2009) of each estimate of the STAG trees inferred from the sets of orthogroups with all  
139 species present. Thus, consensus STAG trees contain support values at internal bipartitions that

140 quantify the proportion of input trees in which that bipartition occurs. The number of input trees used  
141 for species inference for each group is given in Table 1; the number of orthogroups with all species  
142 present.

143 To place these results in context, species trees for the same species datasets were also inferred  
144 with a number of leading methods for species tree inference (Supplemental File S1 Table S2). This  
145 set comprised ASTRAL (Mirarab and Warnow 2015), Concatenated MSA (CMSA), NJst (Liu and Yu  
146 2011) and Guenomu (Martins, et al. 2016). Each method was run using best practice approaches  
147 for these methods (see Methods). The species tree produced by STAG agreed with the published  
148 species tree more frequently than any of the other methods (Figure 4, Table 4). Moreover, the  
149 median and mean Robinson-Foulds distance between the STAG consensus species tree and the  
150 published species tree was lower than for any other method (Figure 4, Table 4). An example tree  
151 where all of the tested methods disagree is provided in Figure 5. Here, partitions that are incorrect  
152 in the STAG consensus species tree receive low support values in contrast to the other tested  
153 methods (Figure 5).

154 ***Branch lengths obtained from STAG consensus trees are comparable to those***  
155 ***obtained concatenated multiple sequence alignments***

156 Given that STAG performed well on the tree topological tests described above it was investigated  
157 whether the branch lengths of the STAG consensus trees accurately represented molecular  
158 phylogenetic distances between species. To provide an unbiased comparison, only the species trees  
159 where all methods were correct and thus had 100% agreement on topology were analysed (Figure  
160 6). The branch lengths obtained from STAG consensus trees correlate well with those produced by  
161 other methods (mean  $r^2 = 0.72$ ), and are essentially identical to those produced using concatenated  
162 multiple sequence alignments ( $r^2 = 0.99$ ,  $p = 10^{-77}$ , Figure 6 & Supplemental File S1 Table S3). Thus  
163 branch lengths provided by STAG consensus trees are suitable for use in downstream analyses  
164 such as ancestral state reconstruction or time calibration.

165 ***STAG is fast and efficient***

166 To demonstrate the performance characteristics of STAG the time and RAM usage across the 12  
167 species datasets was analysed. The maximum time and RAM usage for STAG to infer a consensus  
168 species tree on a single core of a conventional desktop computer was 95.1 seconds and 0.12 GB

169 respectively (Table 5). Across the 12 datasets the run time was linearly dependent on the number of  
170 species and number of trees being analysed (Supplemental File S1 Figure S1). Similar the RAM  
171 requirements were linearly dependent on the number of species (Supplemental File S1 Figure S1).

## 172 **Discussion**

173 With fully sequenced genomes available for many species, there is abundant sequence data from  
174 which to infer species trees. However, the majority of species tree inference methods are restricted  
175 to use one-to-one orthologous sequences that are present in all species in the analysis. Such groups  
176 of sequences are available only if gene duplication or loss has not occurred during the divergence  
177 of that gene family. In this work it is shown that such one-to-one orthogroups are comparatively rare  
178 in real biological datasets, and become rarer as species tree length increases (a product of increased  
179 divergence time and increased species sampling). We presented a novel method called STAG  
180 (Species Tree inference from All Genes). The method constructs a consensus species tree from  
181 trees from all orthogroups in which all species are present, irrespective of the gene copy number per  
182 species in the orthogroup. On real species datasets STAG out-performed species trees inferred by  
183 comparable methods such as ASTRAL, NJst, and Guenomu as well as maximum likelihood trees  
184 inferred from concatenated multiple sequence alignments (CMSA).

185 The testing was performed using 12 real biological datasets sampled from throughout the eukaryotic  
186 domain. At the time of writing, this is the largest collection of biological datasets for testing species  
187 tree inference that has been assembled. The use of real biological datasets in species tree inference  
188 evaluation eliminates modelling assumptions that are required in order to generate simulated test  
189 datasets. Moreover, widely sampled real biological datasets reflect the true disparity in real species  
190 datasets and thus accurately represent the kinds of datasets to which the method will be applied.  
191 The disadvantage of biological data is that the ground truth is not known. Thus, for each of these 12  
192 clades of species, a published study that inferred a species tree from expert curation was accepted  
193 as true in order to facilitate comparison and benchmarking of the methods tested here. The tests  
194 should not bias the results in favour of any of the tested species tree inference methods as they were  
195 not used to generate the reference trees. Moreover, these tests should not bias towards STAG as  
196 multi-copy gene trees were not used in any of these studies. Furthermore, the 12 datasets presented

197 here represent a significant increase over previous analyses that only used 1 (Liu and Yu 2011;  
198 Martins, et al. 2016) or at most 3 (Mirarab, et al. 2014) biological datasets.

199 STAG has been implemented as a freely available, standalone program. It has been designed to be  
200 easy to use. It requires as input a directory of gene trees (which do not have to be rooted) and a file  
201 describing how gene names map to species. It doesn't require any pre-processing of the gene trees,  
202 for example to exclude trees with duplications or trees with too few taxa. It has been designed to  
203 integrate with OrthoFinder (Emms and Kelly 2015), which is a method for inferring the set of  
204 orthogroups for all genes in a set of species. It can be launched with a single command directly from  
205 a set of OrthoFinder results. The method is also fast, taking only 95.1 seconds on a single core on  
206 the largest dataset. The peak RAM usage was 0.12 GB. This analysis was for a set of 47 species  
207 and involved the inference of 4553 individual estimates of the species tree, which were combined to  
208 give the final STAG species tree. The gene trees that were used were all automatically generated  
209 and involved no expert curation.

210 Although STAG is fully automated and intended for use with large datasets, it is equally well-suited  
211 to the inference of the species tree from a carefully curated set of gene trees, as is common for  
212 studies that aim to resolve challenging clades of the tree of life. Thus careful filtering and processing  
213 assemblages of multi-gene family alignments and trees prior to running STAG will likely aid in  
214 increasing the accuracy of species tree inference. In this way, STAG will aid expert curation and  
215 analysis of phylogenetic datasets enabling substantial increases in data availability.

216 The units for the branch lengths in the STAG species tree are the same as the units in the input gene  
217 trees. In most cases, these will be the number of substitutions per site. The tree branch lengths in  
218 the STAG consensus tree are the average branch lengths across all the individual trees inferred  
219 from each gene family. Thus, the branch lengths represent the average number of substitutions per  
220 sites across a large range of gene families. This is an important feature of STAG trees, as these  
221 branch lengths can be used directly in downstream analyses such as ancestral state reconstruction  
222 and time calibration. Equivalent utility is not present in species trees generated using ASTRAL, NJst,  
223 or Guenomu. Furthermore, the support values for each bipartition in a consensus STAG tree are the  
224 proportion of times that the bipartition is seen in each of the individual species tree estimates. They



225 are therefore lower, in general, than those given by the concatenation method, which can quickly  
226 reach 100% support even for bipartitions believed to be incorrect (Salichos and Rokas 2013) see  
227 also Figure 5.

## 228 ***Materials and methods***

### 229 ***Algorithm overview***

230 STAG obtains an estimate for divergence between each species pair from orthologous gene pairs  
231 in a given gene tree. Within a gene tree these estimates do not need to come from the same ortholog,  
232 but rather the closest estimate for each species pair is taken to mitigate against problems such as  
233 hidden paralogy. The input to STAG is a set of unrooted gene trees (Figure 7). For each gene tree  
234 containing all species, STAG identifies the closest pair of genes from those species as those that  
235 are separated by the shortest branch length. These shortest distances are used to construct an inter-  
236 species distance matrix, and a tree is inferred from this distance matrix using FastME (Lefort, et al.  
237 2015). Thus, for each gene tree containing all species, an estimate is made of the underlying species  
238 tree. These individual estimates are combined using a standard greedy consensus method  
239 (Felsenstein 2005; Swofford and Sullivan 2009). The support for each bipartition in the STAG  
240 consensus species tree is equal to the proportion of individual estimates of the species tree that  
241 contain this bipartition. The branch lengths in the STAG consensus species tree are the average  
242 branch lengths for each bipartition in the individual estimates of the species tree. It is possible that  
243 in some individual estimates of the species tree, the gene pairs used to estimate inter-species  
244 distance are paralogues descended from a gene duplication event followed by the differential loss  
245 of the orthologue for each duplicate. This is known as hidden paralogy (Martin and Burg 2002) and  
246 is a problem that affects all of the other methods tested here and is thus not specific to STAG. The  
247 assumption that one-to-one genes in a tree are orthologues is common to all methods that infer trees  
248 from presumed orthologues.

### 249 ***Datasets for evaluation and benchmarking***

250 We used the 12 biological datasets and literature-derived species tree topologies from a previous  
251 study (Emms and Kelly 2017). This consisted of a diverse set of species sampled from throughout  
252 the eukaryotic domain. This included every named group of eukaryotes on Ensembl Genomes  
253 containing >4 genera as well as sets of 47 Birds, 42 Green Plants and 16 Kinetoplastids. For each

254 dataset, the species tree topology was taken the best available from a published study (Table 2,  
255 Supplemental File S1).

256 Orthogroups were inferred for each species set using OrthoFinder (Emms and Kelly 2015). Multiple  
257 sequence alignments (MSA) were inferred for each orthogroup using MAFFT L-INS-i (Katoch and  
258 Standley 2013) and gene trees were inferred from these MSAs using IQTree (Nguyen, et al. 2015).  
259 Appropriate subsets of this data were used to evaluate all methods presented in this study according  
260 to best practices described the following section.

### 261 ***Implementation of comparative methods***

262 There is no consensus best practice for construction of concatenated multiple sequence alignments  
263 for species tree inference (Supplemental File S1). To infer the CMSA species tree, each alignment  
264 was trimmed to include only those columns present in 50% or more of the species. The species tree  
265 was inferred from the concatenated alignment using IQ-TREE, as was done for the individual gene  
266 trees. We used ASTRAL version 5.5.9 with default parameters. We used the implementation of NJst  
267 available at <https://github.com/adamallo/NJstM> (last updated Dec 2016) using the original method.  
268 We used Guenomu version 201308. For Guenomu we used the provided control file, but at the  
269 authors suggestion reduced 'param\_reconciliation\_prior' to 10<sup>-9</sup> to attempt to resolve the lack of  
270 convergence for some datasets. The Metazoa and Primates datasets returned a flat posterior  
271 distribution for the species tree and were recorded as 'No result' (equal probabilities for each of the  
272 sampled species tree topologies) To attempt to run the Birds and Plants datasets, we excluded the  
273 largest 200 orthogroups and reduced the number of number of sample generations and number of  
274 samples by a factor of 10 (to 'param\_n\_generations = 5000 10000' and 'param\_n\_samples = 100').  
275 We ran these datasets on the University of Oxford HPC ARCUS-B in parallel with 16 cores but they  
276 timed out at 120 hours without completing the initial 5000 burn-in generations (for comparison the  
277 longest runtime for STAG was 95.1s on a single core on a desktop machine). Thus the bird and plant  
278 datasets were recorded as 'Timeout'.

279 For species where gene duplication and loss were common, few single-copy orthogroups were  
280 identified with all species present (Figure 1 & Table 1). In particular, no single-copy orthogroups with  
281 all species present were identified in the Plants. This makes it impossible to infer a species tree

282 using only single-copy orthologues. To overcome this problem, and allow us to infer a species tree  
283 using ASTRAL, NJst and concatenated multiple sequence alignments (CMSA), we relaxed the data  
284 selection criteria allowing selecting orthogroups that were single-copy for a proportion of species.  
285 This method allowed a smaller proportion of species to be present and single-copy in an orthogroup  
286 if it resulted in a proportionally greater increase in the number of orthogroups that could be used  
287 (Supplemental File S1 Figure S2, Supplemental File S1 Table S4). In all cases, only the single-copy  
288 orthologues in these orthogroups were used for species tree inference and multiple copy genes were  
289 removed from the alignment. This made it possible to infer a species tree with CMSA, ASTRAL and  
290 NJst for the plants dataset.

291 This relaxed data selection criterion improved the accuracy of CMSA and ASTRAL on average  
292 across the 12 datasets used in this study and thus these trees were used for CMSA and ASTRAL  
293 when comparing against STAG. STAG and Guenomu have no requirement for single-copy  
294 orthogroups and so this orthogroup selection method was not required for these methods.

### 295 **Software availability**

296 STAG is written in python. The source code and precompiled binary are available in the  
297 Supplemental material (Supplemental File S2) and at <https://github.com/davidemms/STAG>. The  
298 software is operated via command line interface and can be used on Linux operating systems.

### 299 **Disclosure declaration**

300 The authors declare no competing interests.

### 301 **Acknowledgements**

302 SK is a Royal Society University Research Fellow. This work was supported by the European Union's  
303 Horizon 2020 research and innovation programme under grant agreement number 637765. The  
304 authors would like to acknowledge the use of the University of Oxford Advanced Research  
305 Computing (ARC) facility in carrying out this work. <http://dx.doi.org/10.5281/zenodo.22558>

### 306 **References**

307 Boussau B, Szollosi GJ, Duret L, Gouy M, Tannier E, Daubin V 2013. Genome-scale coestimation  
308 of species and gene trees. *Genome Research* 23: 323-330. doi: DOI 10.1101/gr.141978.112

- 309 dos Reis M, Donoghue PCJ, Yang ZH 2014. Neither phylogenomic nor palaeontological data support  
310 a Palaeogene origin of placental mammals. *Biology Letters* 10. doi: ARTN 20131003  
311 10.1098/rsbl.2013.1003
- 312 Emms DM, Kelly S 2015. OrthoFinder: solving fundamental biases in whole genome comparisons  
313 dramatically improves orthogroup inference accuracy. *Genome Biology* 16. doi: ARTN 157  
314 10.1186/s13059-015-0721-2
- 315 Emms DM, Kelly S 2017. STRIDE: Species Tree Root Inference from Gene Duplication Events.  
316 *Molecular Biology and Evolution*: msx259-msx259. doi: 10.1093/molbev/msx259
- 317 Felsenstein J 2005. PHYLIP (Phylogeny Inference Package) version 3.6. Department of Genome  
318 Sciences, University of Washington, Seattle.
- 319 James TY, Kauff F, Schoch CL, Matheny PB, Hofstetter V, Cox CJ, Celio G, Gueidan C, Fraker E,  
320 Miadlikowska J, Lumbsch HT, Rauhut A, Reeb V, Arnold AE, Amtoft A, Stajich JE, Hosaka K, Sung  
321 GH, Johnson D, O'Rourke B, Crockett M, Binder M, Curtis JM, Slot JC, Wang Z, Wilson AW,  
322 Schussler A, Longcore JE, O'Donnell K, Mozley-Standridge S, Porter D, Letcher PM, Powell MJ,  
323 Taylor JW, White MM, Griffith GW, Davies DR, Humber RA, Morton JB, Sugiyama J, Rossman AY,  
324 Rogers JD, Pfister DH, Hewitt D, Hansen K, Hambleton S, Shoemaker RA, Kohlmeyer J, Volkmann-  
325 Kohlmeyer B, Spotts RA, Serdani M, Crous PW, Hughes KW, Matsuura K, Langer E, Langer G,  
326 Untereiner WA, Lucking R, Budel B, Geiser DM, Aptroot A, Diederich P, Schmitt I, Schultz M, Yahr  
327 R, Hibbett DS, Lutzoni F, McLaughlin DJ, Spatafora JW, Vilgalys R 2006. Reconstructing the early  
328 evolution of Fungi using a six-gene phylogeny. *Nature* 443: 818-822. doi: 10.1038/nature05110
- 329 Jarvis ED, Mirarab S, Aberer AJ, Li B, Houde P, Li C, Ho SYW, Faircloth BC, Nabholz B, Howard  
330 JT, Suh A, Weber CC, da Fonseca RR, Li JW, Zhang F, Li H, Zhou L, Narula N, Liu L, Ganapathy  
331 G, Boussau B, Bayzid MS, Zavidovych V, Subramanian S, Gabaldon T, Capella-Gutierrez S, Huerta-  
332 Cepas J, Rekepalli B, Munch K, Schierup M, Lindow B, Warren WC, Ray D, Green RE, Bruford MW,  
333 Zhan XJ, Dixon A, Li SB, Li N, Huang YH, Derryberry EP, Bertelsen MF, Sheldon FH, Brumfield RT,  
334 Mello CV, Lovell PV, Wirthlin M, Schneider MPC, Prosdocimi F, Samaniego JA, Velazquez AMV,  
335 Alfaro-Nunez A, Campos PF, Petersen B, Sicheritz-Ponten T, Pas A, Bailey T, Scofield P, Bunce M,

- 336 Lambert DM, Zhou Q, Perelman P, Driskell AC, Shapiro B, Xiong ZJ, Zeng YL, Liu SP, Li ZY, Liu  
337 BH, Wu K, Xiao J, Yinqi X, Zheng QM, Zhang Y, Yang HM, Wang J, Smeds L, Rheindt FE, Braun  
338 M, Fjeldsa J, Orlando L, Barker FK, Jonsson KA, Johnson W, Koepfli KP, O'Brien S, Haussler D,  
339 Ryder OA, Rahbek C, Willerslev E, Graves GR, Glenn TC, McCormack J, Burt D, Ellegren H, Alstrom  
340 P, Edwards SV, Stamatakis A, Mindell DP, Cracraft J, Braun EL, Warnow T, Jun W, Gilbert MTP,  
341 Zhang GJ 2014. Whole-genome analyses resolve early branches in the tree of life of modern birds.  
342 *Science* 346: 1320-1331. doi: 10.1126/science.1253451
- 343 Katoh K, Standley DM 2013. MAFFT Multiple Sequence Alignment Software Version 7:  
344 Improvements in Performance and Usability. *Molecular Biology and Evolution* 30: 772-780. doi: DOI  
345 10.1093/molbev/mst010
- 346 Lee TH, Tang HB, Wang XY, Paterson AH 2013. PGDD: a database of gene and genome duplication  
347 in plants. *Nucleic Acids Research* 41: D1152-D1158. doi: 10.1093/nar/gks1104
- 348 Lefort V, Desper R, Gascuel O 2015. FastME 2.0: A Comprehensive, Accurate, and Fast Distance-  
349 Based Phylogeny Inference Program. *Molecular Biology and Evolution* 32: 2798-2800. doi:  
350 10.1093/molbev/msv150
- 351 Liu L, Yu LL 2011. Estimating Species Trees from Unrooted Gene Trees. *Systematic Biology* 60:  
352 661-667. doi: 10.1093/sysbio/syr027
- 353 Mao M, Gibson T, Dowton M 2015. Higher-level phylogeny of the Hymenoptera inferred from  
354 mitochondrial genomes. *Molecular Phylogenetics and Evolution* 84: 34-43. doi:  
355 10.1016/j.ympev.2014.12.009
- 356 Martin AP, Burg TM 2002. Perils of paralogy: Using HSP70 genes for inferring organismal  
357 phylogenies. *Systematic Biology* 51: 570-587. doi: 10.1080/10635150290069995
- 358 Martins LD, Mallo D, Posada D 2016. A Bayesian Supertree Model for Genome-Wide Species Tree  
359 Reconstruction. *Systematic Biology* 65: 397-416. doi: 10.1093/sysbio/syu082
- 360 Meredith RW, Janecka JE, Gatesy J, Ryder OA, Fisher CA, Teeling EC, Goodbla A, Eizirik E, Simao  
361 TLL, Stadler T, Rabosky DL, Honeycutt RL, Flynn JJ, Ingram CM, Steiner C, Williams TL, Robinson  
362 TJ, Burk-Herrick A, Westerman M, Ayoub NA, Springer MS, Murphy WJ 2011. Impacts of the

- 363 Cretaceous Terrestrial Revolution and KPg Extinction on Mammal Diversification. *Science* 334: 521-  
364 524. doi: 10.1126/science.1211028
- 365 Mirarab S, Reaz R, Bayzid MS, Zimmermann T, Swenson MS, Warnow T 2014. ASTRAL: genome-  
366 scale coalescent-based species tree estimation. *Bioinformatics* 30: 1541-1548. doi:  
367 10.1093/bioinformatics/btu462
- 368 Mirarab S, Warnow T 2015. ASTRAL-II: coalescent-based species tree estimation with many  
369 hundreds of taxa and thousands of genes. *Bioinformatics* 31: 44-52. doi:  
370 10.1093/bioinformatics/btv234
- 371 Nguyen LT, Schmidt HA, von Haeseler A, Minh BQ 2015. IQ-TREE: A Fast and Effective Stochastic  
372 Algorithm for Estimating Maximum-Likelihood Phylogenies. *Molecular Biology and Evolution* 32:  
373 268-274. doi: 10.1093/molbev/msu300
- 374 Parfrey LW, Lahr DJG, Knoll AH, Katz LA 2011. Estimating the timing of early eukaryotic  
375 diversification with multigene molecular clocks. *Proc Natl Acad Sci U S A* 108: 13624-13629. doi:  
376 10.1073/pnas.1110633108
- 377 Perelman P, Johnson WE, Roos C, Seuanez HN, Horvath JE, Moreira MAM, Kessing B, Pontius J,  
378 Roelke M, Rumpler Y, Schneider MPC, Silva A, O'Brien SJ, Pecon-Slattery J 2011. A Molecular  
379 Phylogeny of Living Primates. *Plos Genetics* 7. doi: ARTN e1001342  
380 10.1371/journal.pgen.1001342
- 381 Robinson DF, Foulds LR 1981. Comparison of Phylogenetic Trees. *Mathematical Biosciences* 53:  
382 131-147. doi: Doi 10.1016/0025-5564(81)90043-2
- 383 Roch S, Steel M 2015. Likelihood-based tree reconstruction on a concatenation of aligned sequence  
384 data sets can be statistically inconsistent. *Theoretical Population Biology* 100: 56-62. doi:  
385 10.1016/j.tpb.2014.12.005
- 386 Ruhfel BR, Gitzendanner MA, Soltis PS, Soltis DE, Burleigh JG 2014. From algae to angiosperms-  
387 inferring the phylogeny of green plants (Viridiplantae) from 360 plastid genomes. *Bmc Evolutionary*  
388 *Biology* 14. doi: Artn 23

389 10.1186/1471-2148-14-23

390 Salichos L, Rokas A 2013. Inferring ancient divergences requires genes with strong phylogenetic  
391 signals. *Nature* 497: 327-+. doi: 10.1038/nature12130

392 Swofford DL, Sullivan J 2009. Phylogeny inference based on parsimony and other methods using  
393 PAUP\*. *Phylogenetic Handbook: A Practical Approach to Phylogenetic Analysis and Hypothesis*  
394 *Testing*, 2nd Edition: 267-312.

395 **Figures**  
396 **Figure 1**

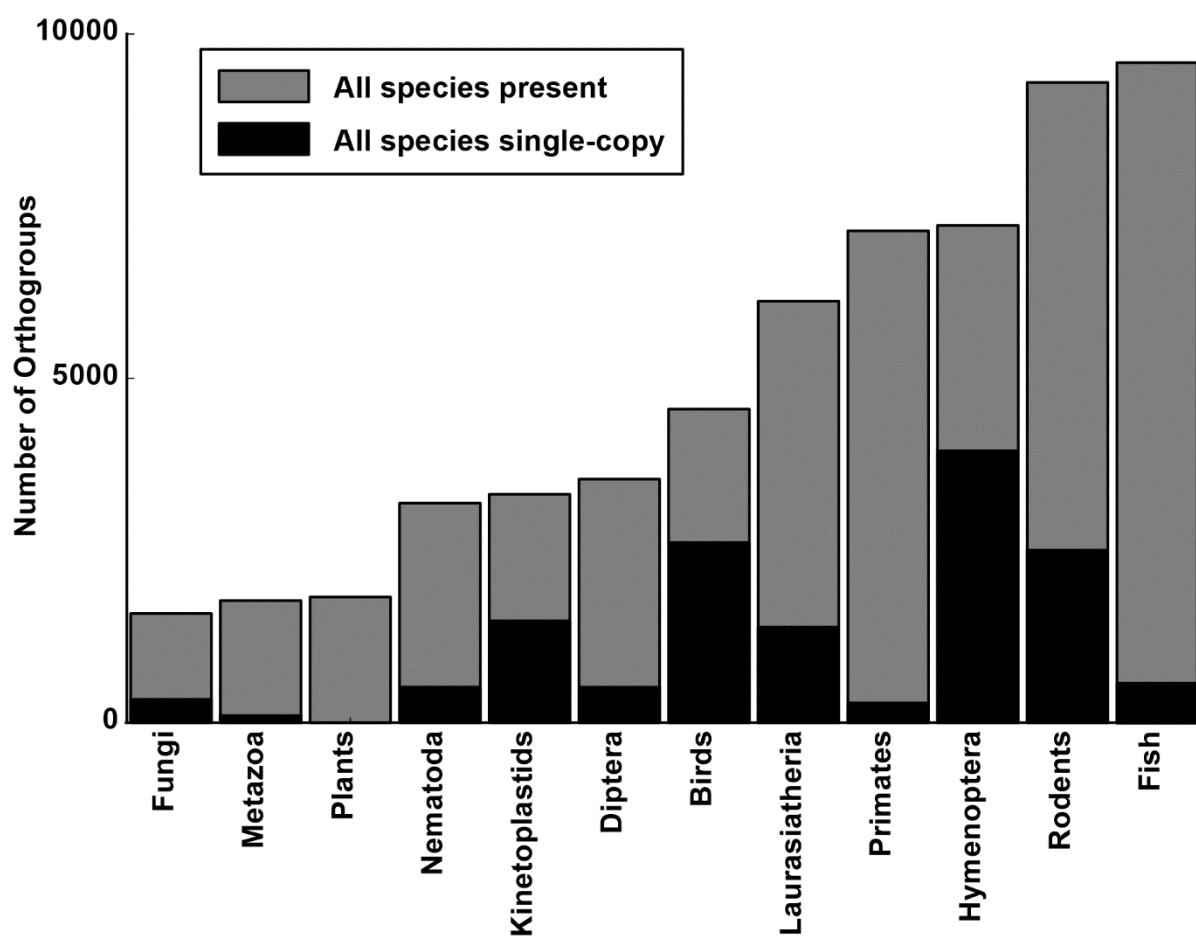

397

398

399



400 **Figure 2**

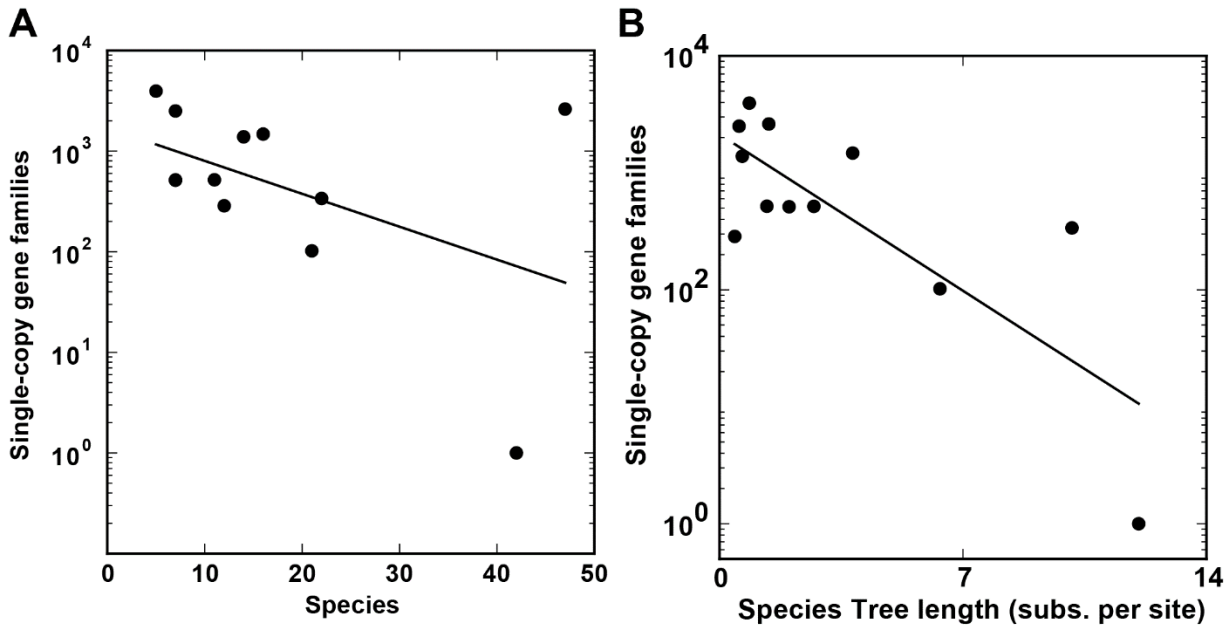

401

402 **Figure 3**

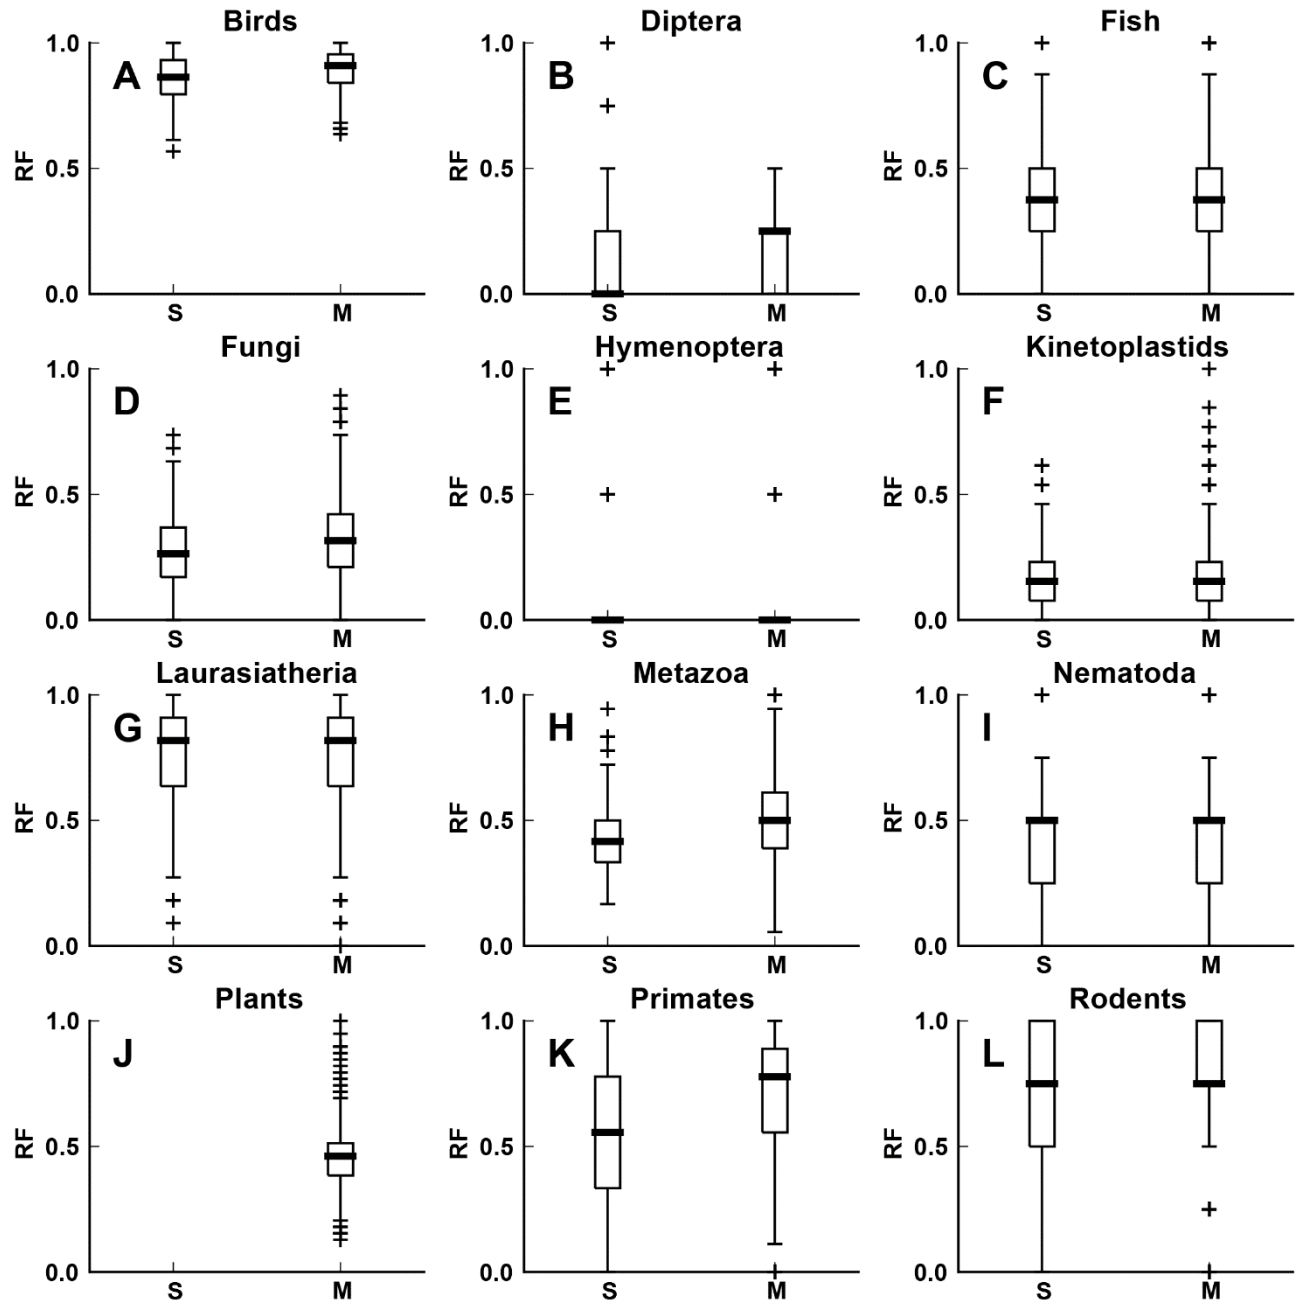

403

404

405 **Figure 4**

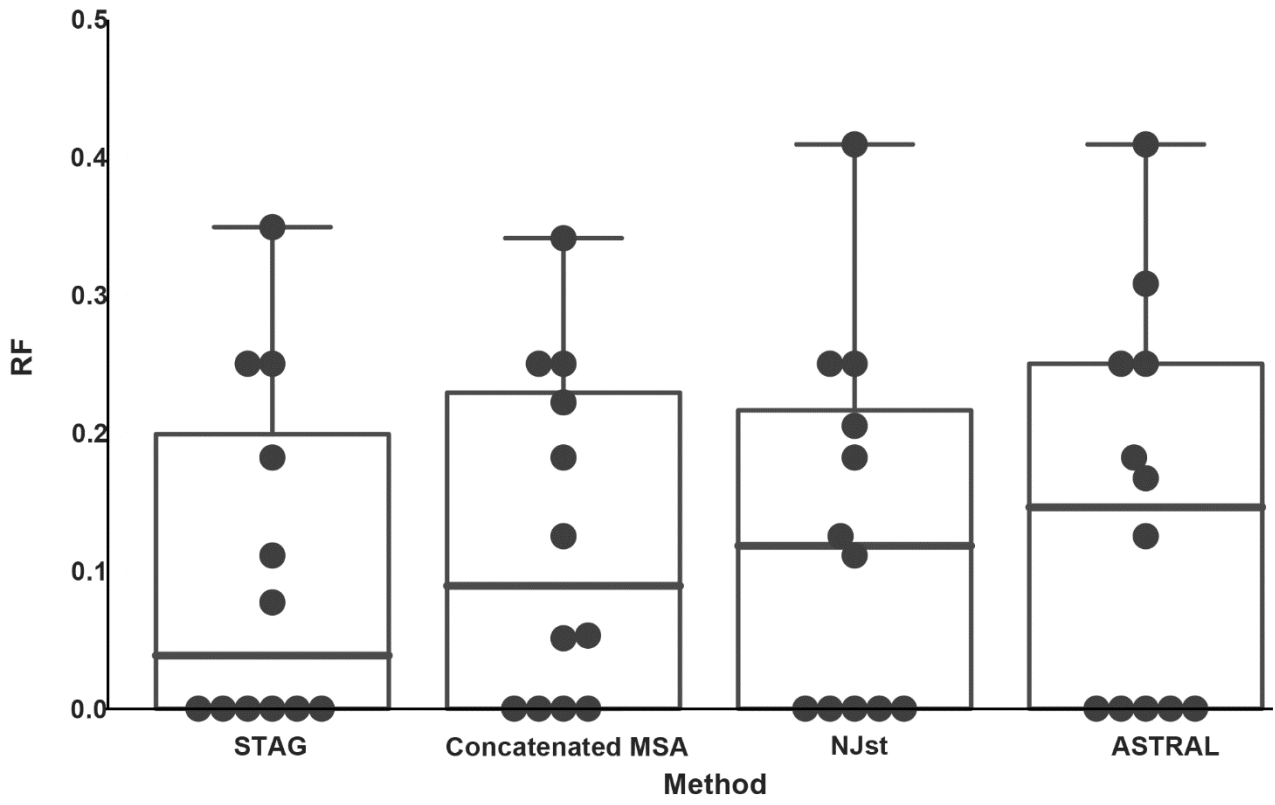

406

407

408 **Figure 5**

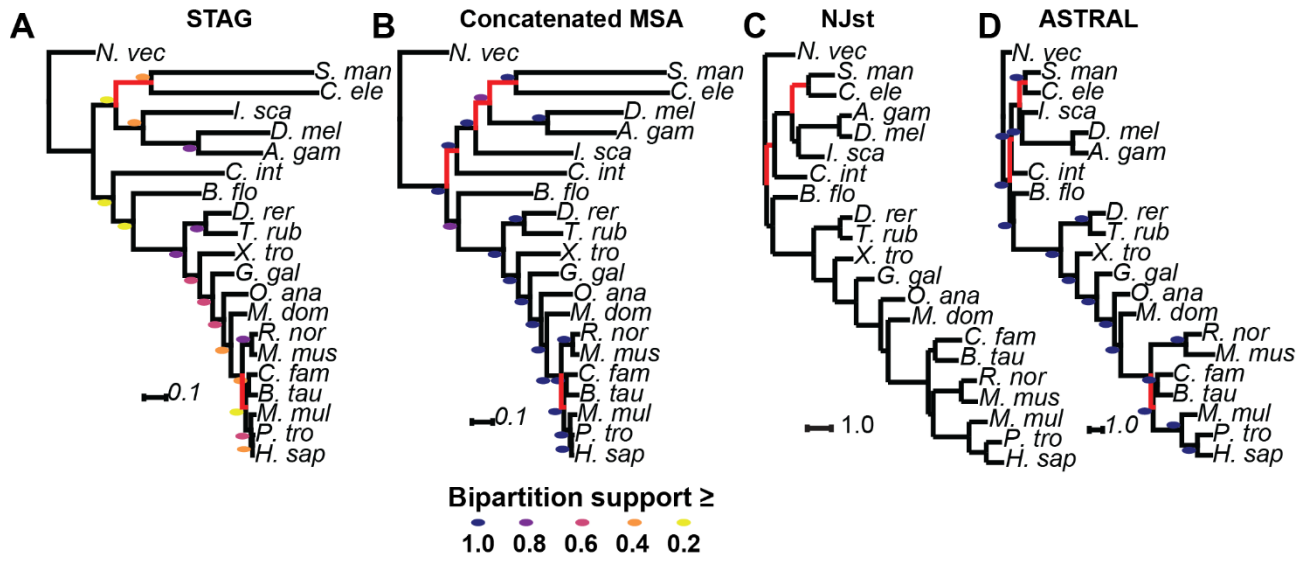

409

410

411 **Figure 6**

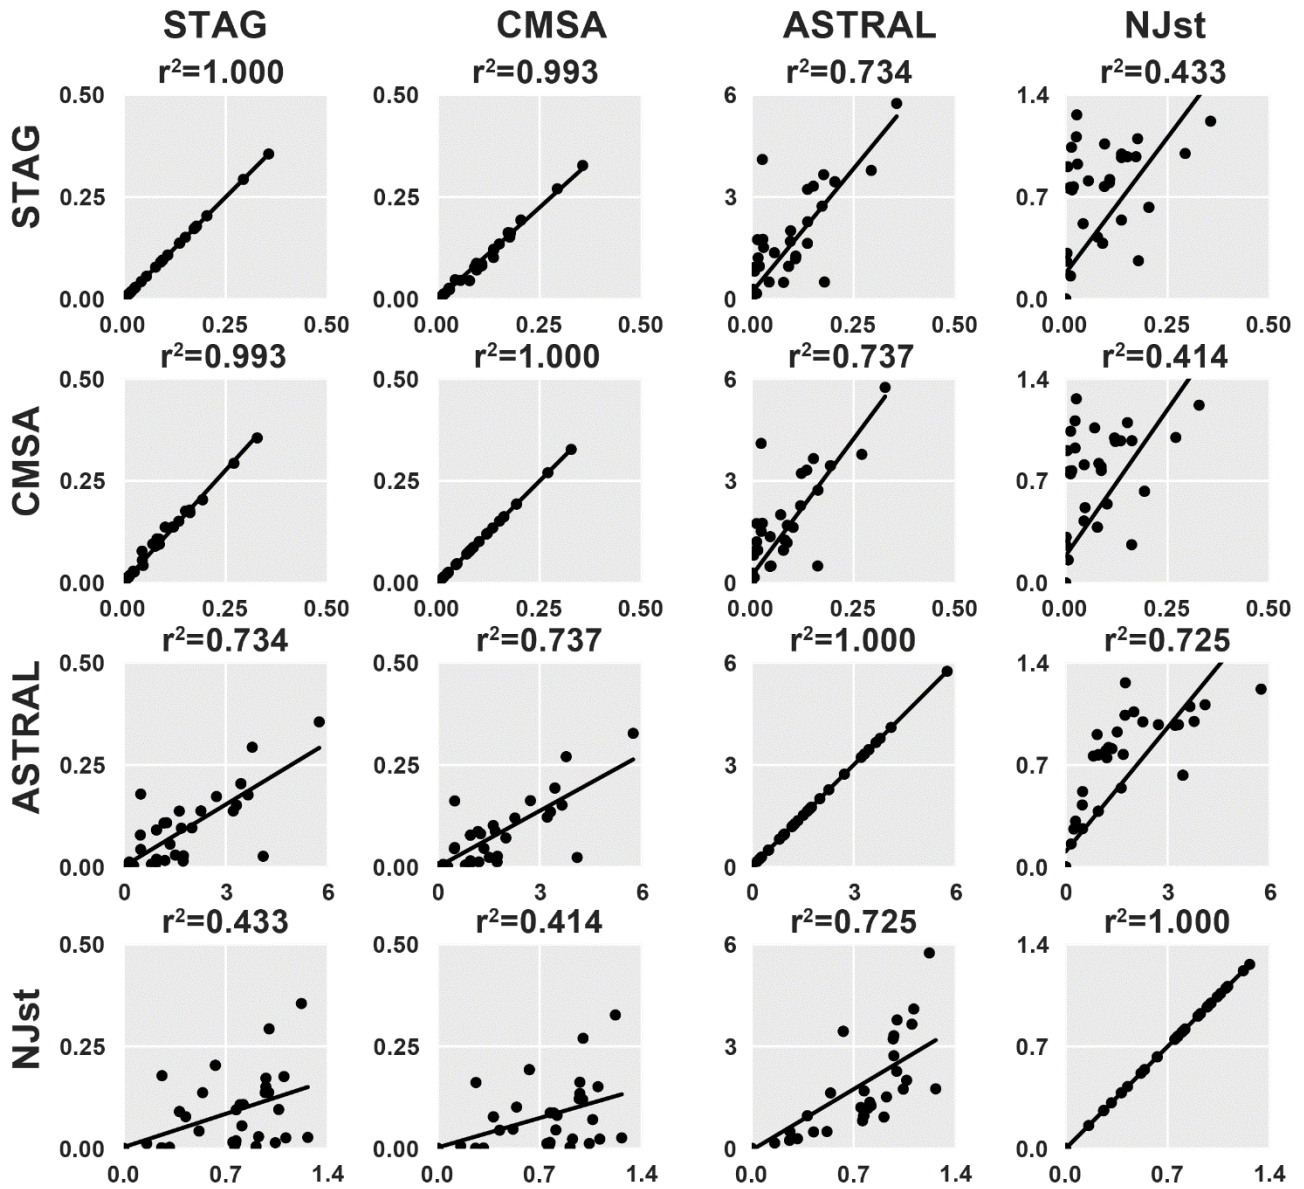

412

413

414 **Figure 7**

---

**Algorithm 1:** STAG Algorithm

---

```
1 Function STAG ( $G$ );  
   Input :  $G$ : Set of unrooted gene trees  
   Output : Unrooted species tree with branch lengths &  
             support.  
2  $S = \text{Array}()$  // tree estimates  
3 foreach Gene tree,  $t$  in  $G$  do  
4   | if not AllSpeciesPresent(  $t$ ) then continue  
5   |  $d \leftarrow \text{ShortestDistances}(t)$   
6   |  $S.\text{Append}(\text{FastmeTree}(d))$   
7 end  
8 return ConsensusTree ( $S$ )
```

---

**Algorithm 2:** Shortest distance between each species-pair

---

```
1 Function ShortestDistances ( $t$ );  
   Input :  $t$ : Unrooted gene tree  
   Output :  $d$ : ( $n\text{Species} \times n\text{Species}$ ) distance matrix  
2  $d \leftarrow [[0, \text{inf}, \dots, \text{inf}], [\text{inf}, 0, \text{inf}, \dots, \text{inf}], \dots, [\text{inf}, \dots, \text{inf}, 0]]$   
   foreach Gene,  $g_1$  in  $t$  do  
3   | foreach Gene,  $g_2$  in  $t$  do  
4   | | if  $S(g_1) = S(g_2)$  then continue  
5   | |  $d[S(g_1), S(g_2)] \leftarrow \min(\mathbf{D}(g_1, g_2), d[S(g_1), S(g_2)])$   
6   | end  
7 end  
8 return  $d$ 
```

---

415

416 **Figure Legends**

417

418 **Figure 1**

419 The number of orthogroups with all species present (grey bars) and with all species present and  
420 single-copy (black bars) in the 12 biological datasets.

421 **Figure 2**

422 The number of orthogroups with all species present and single-copy in the 12 biological datasets  
423 versus A) the number of species in that dataset B) The species tree length.

424 **Figure 3**

425 The distribution of Robinson-Foulds distances between the literature-derived species tree and i) the  
426 IQ-TREE trees from orthogroups with all species present and single-copy (S) ii) the individual per-  
427 orthogroup species trees inferred by STAG from orthogroups with all species present but not single-  
428 copy in all species (i.e. multi-copy genes M). Results are for the 12 biological datasets (A-L), for the  
429 plants dataset there were no orthogroups identified with all species present and single-copy and thus  
430 there is no data for S.

431 **Figure 4**

432 Box plots for the Robinson-Foulds (RF) distance between the literature-derived species tree and the  
433 species trees inferred by each of the tested methods across the 12 biological datasets. The dots  
434 give the individual RF distances for each of the 12 datasets.

435 **Figure 5**

436 The species trees inferred for the metazoa dataset by A) STAG B) CMSA C) NJst D) ASTRAL.  
437 Branch lengths are in A-B) substitutions per site or C-D) coalescent units. Bipartition support values  
438 are colour-coded next to each branch for those methods returning support values. A scale for the  
439 colour coding is provided in the figure.

440 **Figure 6**

441 Correlation between the branch lengths returned by STAG, CMSA, ASTRAL & NJst for the datasets  
442 for which all four methods returned the same (correct) species tree topology. Line of best fit is for  
443 the linear least-squares regression, with the  $r^2$  value given above each plot.

444 **Figure 7**

445 Pseudo-code for the STAG algorithm. The algorithm makes use of a number standard routines:  
446 'AllSpeciesPresent' returns True if all species are present in a gene tree and False otherwise;  
447 'FastmeTree' calls the FastME program to calculate a tree from a distance matrix; 'ConsensusTree'  
448 calculates the greed consensus tree from a set of trees.



449 **Tables**

450 **Table 1: Descriptive statistics of the 12 species datasets**

| Group                      | Species | Genes   | Orthogroups | Orthogroups:<br>all species<br>present | Orthogroups:<br>all species<br>present &<br>single-copy | % Single-<br>copy |
|----------------------------|---------|---------|-------------|----------------------------------------|---------------------------------------------------------|-------------------|
| <b>Birds</b>               | 47      | 708005  | 14454       | 4552                                   | 2616                                                    | 57.5%             |
| <b>Flies (Diptera)</b>     | 7       | 120847  | 11688       | 3536                                   | 513                                                     | 14.5%             |
| <b>Fish</b>                | 11      | 314941  | 16520       | 9585                                   | 518                                                     | 5.4%              |
| <b>Fungi</b>               | 21      | 259240  | 9325        | 1583                                   | 338                                                     | 21.4%             |
| <b>Hymenoptera</b>         | 5       | 80159   | 9157        | 7221                                   | 3947                                                    | 54.7%             |
| <b>Kinetoplastids</b>      | 16      | 147588  | 9731        | 3317                                   | 1476                                                    | 44.5%             |
| <b>Laurasiatheria</b>      | 14      | 274077  | 15804       | 6118                                   | 1386                                                    | 22.7%             |
| <b>Metazoa</b>             | 21      | 407551  | 13017       | 1773                                   | 102                                                     | 5.8%              |
| <b>Nematoda</b>            | 7       | 134567  | 8392        | 3187                                   | 517                                                     | 16.2%             |
| <b>Primates + outgroup</b> | 11      | 383525  | 19096       | 7142                                   | 286                                                     | 4.0%              |
| <b>Rodents</b>             | 7       | 169136  | 15485       | 9296                                   | 2505                                                    | 26.9%             |
| <b>Plants</b>              | 42      | 1366268 | 28356       | 1823                                   | 0                                                       | 0.0%              |

451

452

453 **Table 2: Brief summary of method used for reference species tree inference. For full details**  
454 **see Supplemental File S1.**

| <b>Group</b>          | <b>Species Tree Method</b>                                                |
|-----------------------|---------------------------------------------------------------------------|
| <b>Birds</b>          | CMSA nucleotides, mixed, partitioned, third nucleotide of codons excluded |
| <b>Diptera</b>        | CMSA nucleotides, genes, partitioned, third nucleotide of codon removed   |
| <b>Fish</b>           | CMSA, nucleotides, genes, partitioned by codon position                   |
| <b>Fungi</b>          | CMSA, partitioned by gene (6), 3 AA, 3 RNA genes                          |
| <b>Hymenoptera</b>    | CMSA, nucleotides, mixed, partitioned                                     |
| <b>Kinetoplastids</b> | CMSA, amino acids                                                         |
| <b>Laurasiatheria</b> | CMSA, amino acids                                                         |
| <b>Metazoa</b>        | CMSA, amino acids                                                         |
| <b>Nematoda</b>       | MSA, SSU rRNA                                                             |
| <b>Primates</b>       | CMSA, nucleotide, mixed, partitioned                                      |
| <b>Rodents</b>        | CMSA, amino acids                                                         |
| <b>Plants</b>         | CMSA, nucleotides , partitioned                                           |

455

456

457 **Table 3: Comparison of the accuracy of trees inferred using single-copy and multi-copy**  
458 **genes.**

| <b>Group</b>          | <b>Orthogroups (SC)</b> | <b>Total RF (SC)</b> | <b>Mean RF (SC)</b> | <b>Orthogroups (Combined)</b> | <b>Total RF (Combined)</b> | <b>Mean RF (Combined)</b> |
|-----------------------|-------------------------|----------------------|---------------------|-------------------------------|----------------------------|---------------------------|
| <b>Birds</b>          | 2616                    | 2092.8               | 0.8                 | 4552                          | 3719.04                    | 0.82                      |
| <b>Diptera</b>        | 513                     | 51.3                 | 0.1                 | 3536                          | 414.06                     | 0.12                      |
| <b>Fish</b>           | 518                     | 212.38               | 0.41                | 9585                          | 3476.5                     | 0.36                      |
| <b>Fungi</b>          | 338                     | 91.26                | 0.27                | 1583                          | 452.31                     | 0.29                      |
| <b>Hymenoptera</b>    | 3947                    | 118.41               | 0.03                | 7221                          | 249.37                     | 0.03                      |
| <b>Kinetoplastids</b> | 1476                    | 191.88               | 0.13                | 3317                          | 412.8                      | 0.12                      |
| <b>Laurasiatheria</b> | 1386                    | 748.44               | 0.54                | 6118                          | 3398.36                    | 0.56                      |
| <b>Metazoa</b>        | 102                     | 39.78                | 0.39                | 1773                          | 724.89                     | 0.41                      |
| <b>Nematoda</b>       | 517                     | 186.12               | 0.36                | 3187                          | 1174.02                    | 0.37                      |
| <b>Plants</b>         | 0                       | 0                    | -                   | 1823                          | 692.74                     | 0.38                      |
| <b>Primates</b>       | 286                     | 114.4                | 0.4                 | 7142                          | 3405.28                    | 0.48                      |
| <b>Rodents</b>        | 2505                    | 1402.8               | 0.56                | 9296                          | 5477.4                     | 0.59                      |
| <b>Overall</b>        | 14204                   | 5249.57              | 0.37                | 59133                         | 23596.77                   | 0.40                      |

459

460 **Table 4: Evaluation of species tree inference methods on 12 benchmark datasets**

| Clade                 | STAG         | CMSA         | NJst         | ASTRAL       | Guenomu   |
|-----------------------|--------------|--------------|--------------|--------------|-----------|
| <b>Birds</b>          | 0.349        | 0.341        | 0.409        | 0.409        | Timeout   |
| <b>Diptera</b>        | 0            | 0            | 0            | 0            | 0         |
| <b>Fish</b>           | 0.25         | 0.125        | 0.125        | 0.125        | 0.125     |
| <b>Fungi</b>          | 0            | 0.053        | 0            | 0            | 0.474     |
| <b>Hymenoptera</b>    | 0            | 0            | 0            | 0            | 0         |
| <b>Kinetoplastids</b> | 0            | 0            | 0            | 0            | 0         |
| <b>Laurasiatheria</b> | 0.182        | 0.182        | 0.182        | 0.182        | 0.182     |
| <b>Metazoa</b>        | 0.111        | 0.222        | 0.111        | 0.167        | No result |
| <b>Nematoda</b>       | 0.25         | 0.25         | 0.25         | 0.25         | 0.25      |
| <b>Plants</b>         | 0.077        | 0.051        | 0.205        | 0.308        | Timeout   |
| <b>Primates</b>       | 0            | 0            | 0            | 0            | No result |
| <b>Rodents</b>        | 0            | 0.25         | 0.25         | 0.25         | 0         |
| <b>Mean</b>           | <b>0.102</b> | <b>0.123</b> | <b>0.128</b> | <b>0.141</b> | -         |

461

462

463 **Table 5: Performance characteristics of STAG**

|                       | <b>Species</b> | <b>Trees</b> | <b>Time (s)</b> | <b>RAM (GB)</b> |
|-----------------------|----------------|--------------|-----------------|-----------------|
| <b>Birds</b>          | 47             | 4553         | 95.1            | 0.12            |
| <b>Diptera</b>        | 7              | 3536         | 17.2            | 0.05            |
| <b>Fish</b>           | 11             | 9585         | 61.3            | 0.05            |
| <b>Fungi</b>          | 21             | 1583         | 18.2            | 0.05            |
| <b>Hymenoptera</b>    | 5              | 7220         | 29.1            | 0.04            |
| <b>Kinetoplastids</b> | 16             | 3317         | 24              | 0.05            |
| <b>Laurasiatheria</b> | 14             | 6118         | 44              | 0.05            |
| <b>Metazoa</b>        | 21             | 1773         | 47.9            | 0.06            |
| <b>Nematoda</b>       | 7              | 3187         | 16.6            | 0.04            |
| <b>Plants</b>         | 42             | 7142         | 82.6            | 0.07            |
| <b>Primates</b>       | 11             | 9296         | 54.2            | 0.05            |
| <b>Rodents</b>        | 7              | 1823         | 47.9            | 0.05            |

464

465
